# Supplementary material
Source: publisher site journal article supplement (https://www.spandidos-publications.com/7689/downloadSupplementary)
Supplement: Supplementary file 1 [file downloadSupplementary]

Table SI. Therapy-related adverse effects and immune-related adverse events.

| Therapy-related adverse effects | Disease control, n (%) | Progressive disease, n (%) |
|---------------------------------|------------------------|----------------------------|
| Allergic reaction               | 0 (0.0)                | 1 (3.0)                    |
| Arterial hypertension           | 2 (2.9)                | 0 (0.0)                    |
| Colitis                         | 1 (1.4)                | 1 (3.0)                    |
| Diarrhea                        | 1 (1.4)                | 0 (0.0)                    |
| Epistaxis                       | 2 (2.9)                | 0 (0.0)                    |
| Esophageal variceal bleeding    | 1 (1.4)                | 0 (0.0)                    |
| Hepatitis                       | 9 (12.9)               | 0 (0.0)                    |
| Hypophysitis/adrenalitis        | 1 (1.4)                | 0 (0.0)                    |
| Mucositis                       | 3 (4.3)                | 0 (0.0)                    |
| Myocardial ischemia             | 0 (0.0)                | 1 (3.0)                    |
| Nephritis                       | 1 (1.4)                | 0 (0.0)                    |
| Post-operative bleeding         | 1 (1.4)                | 0 (0.0)                    |
| Pruritus                        | 1 (1.4)                | 0 (0.0)                    |
| Psoriasis worsening             | 1 (1.4)                | 0 (0.0)                    |
| Thyroiditis                     | 1 (1.4)                | 0 (0.0)                    |
| Upper gastrointestinal bleeding | 2 (2.9)                | 0 (0.0)                    |
| None                            | 43 (61.4)              | 30 (90.9)                  |
